# Supplementary material for: Therapeutic Use of Low-Dose Local Anesthetics in Pain, Inflammation, and Other Clinical Conditions: A Systematic Scoping Review
Source: MDPI journal article supplement (doi:10.3390/jcm12237221), 2023-11-21
Supplement: s1 [file s1]

**Table S1.** The main characteristics of the studies included.

|                         |      |                           |                     |                                 | Type of intervention                                                  |                               |                                                                                                                                                                              |                                                                                                                                                    |
|-------------------------|------|---------------------------|---------------------|---------------------------------|-----------------------------------------------------------------------|-------------------------------|------------------------------------------------------------------------------------------------------------------------------------------------------------------------------|----------------------------------------------------------------------------------------------------------------------------------------------------|
| Author                  | Year | Study Type                | Population included | Indication                      | Intervention                                                          | Comparative group             | Effect of the intervention                                                                                                                                                   | Type of evaluation                                                                                                                                 |
| Allen S. et al.         | 2018 | Before and after study    | 562                 | Migraine                        | Bupivacaine 0,25%, Bupivacaine 0,5%, Lidocaine 1%. Local infiltration | No comparative group          | High rates of response to greater occipital nerve block, in decreased migraine pain intensity, are found, but randomized clinical trials are needed to confirm the findings. | Numeric Pain Rating Scale (NPRS). Minimal, moderate, or significant response groups according to decreased NPRS score 1 and 4 weeks after blockade |
| Affaitati G. et al.     | 2009 | Randomized clinical trial | 60                  | Myofascial pain syndrome        | 1 mL of 0.5% bupivacaine hydrochloride infiltration at trigger points | Lidocaine and placebo patches | Myofascial pain control with infiltration treatment but more comfort with patches treatment                                                                                  | Pain intensity scores                                                                                                                              |
| Altınbilek T. et al.    | 2019 | Randomized clinical trial | 60                  | Fibromyalgia                    | 0.1-0.1 ml 0.5% of lidocaine interspinous injection                   | Exercise programs             | When NT is combined with exercise, improvement in pain and depression scores is documented                                                                                   | Pain assessed with VAS, emotional state with the Beck Depression Scale and Beck Anxiety Scale, and quality of life with the SF-36                  |
| Álvarez Urbay M. et al. | 2007 | Prospective study         | 71                  | Chronic pharyngitis             | 0.5 ml of 1% procaine submucosa infiltration                          | No comparative group          | Satisfactory response to the treatment                                                                                                                                       | Control of symptoms                                                                                                                                |
| Amhaz H. et al.         | 2013 | Case report               | 1                   | Contralateral Horner's syndrome | 10 ml lidocaine 1,5% Intradermic injection                            | No comparative group          | Considering neurovascular structures and uncontrolled migration of LA, surveillance should be performed for potential adverse events.                                        | Description contralateral Horner Syndrome                                                                                                          |

|                        |      |                           |     |                                                     |                                                                                       |                                        |                                                                                                                                     |                                                                                                                                          |
|------------------------|------|---------------------------|-----|-----------------------------------------------------|---------------------------------------------------------------------------------------|----------------------------------------|-------------------------------------------------------------------------------------------------------------------------------------|------------------------------------------------------------------------------------------------------------------------------------------|
| Arnér S. et al.        | 1990 | Case reports              | 38  | Neuralgia after nerve injury                        | Peripheral anesthetic block with 5-10ml of 5% bupivacaine                             | No comparative group                   | No long-term effect                                                                                                                 | Neuralgia pain relief                                                                                                                    |
| Arthur B. et al.       | 2019 | Case report               | 1   | Dyspareunia in patients due to vaginal hysterectomy | 4-5ml 0.5% of procaine infiltration                                                   | No comparative group                   | NT of vaginal hysterectomy scars may have a role in the treatment of dyspareunia.                                                   | Control of dyspareunia                                                                                                                   |
| Ashkenazi A. et al.    | 2010 | Systematic review         | 157 | Headache                                            | Different concentrations and anesthetics and reports of combination steroid therapies | For the RCT comparative group: placebo | The results were generally positive but should be taken with caution given the methodological limitations of the available studies. | Migraine pain control with peripheral nerve block, adverse effects                                                                       |
| Atalay NS. et al.      | 2013 | Cohort study              | 60  | Chronic low back pain                               | Lidocaine 20mg/ml                                                                     | Physical therapy                       | This therapy is effective in pain relief, quality of life, disability, and depression                                               | Pain relief scales, disability Questionnaire (RMDQ), quality of life with Nottingham-Health-Profile (NHP), depression assessed with HADS |
| Ay S. et al.           | 2010 | Randomized clinical trial | 80  | Myofascial pain syndrome                            | 2 ml 1% of lidocaine                                                                  | Dry injection into trigger points      | Potential positive effect                                                                                                           | Pain, cervical movement, and depression assessment with scores/scales                                                                    |
| Balevi Batur E. et al. | 2021 | Cohort study              | 60  | Fibromyalgia                                        | Lidocaine al 1%                                                                       | Physical therapy                       | Neural therapy can be an effective treatment to improve quality of life in Fibromyalgia patients                                    | Pain assessed with VAS, quality of life with SF 36 and Fibromyalgia Impact Questionnaire (FIQ)                                           |

|                          |      |                           |            |                                                                 |                                                                                                                  |                        |                                                                                                                                                                                                                                                              |                                                                                                                                      |
|--------------------------|------|---------------------------|------------|-----------------------------------------------------------------|------------------------------------------------------------------------------------------------------------------|------------------------|--------------------------------------------------------------------------------------------------------------------------------------------------------------------------------------------------------------------------------------------------------------|--------------------------------------------------------------------------------------------------------------------------------------|
| Barad M. et al.          | 2022 | Systematic review         | 14 studies | Migraine                                                        | Not applicable                                                                                                   | Variable               | 1. Weak recommendation for major occipital nerve block for the management of chronic migraine compared with placebo, insufficient evidence. 2. Insufficient evidence for trigger point injection with LA compared with saline to reduce acute cephalaea days | Generating recommendations                                                                                                           |
| Boluk Senlikci H. et al. | 2021 | Case report               | 1          | Temporomandibular disorders and dysfunction of sacroiliac joint | 1 ml 0.5% of lidocaine                                                                                           | No comparative group   | The relationship between the craniomandibular system and sacroiliac articulation is unclear. In the current case, NT can be used in craniomandibular disorders that have pathogenic influence on the sacroiliac junction.                                    | Pain assessed with VAS                                                                                                               |
| Bölük Şenlikci H. et al. | 2021 | Randomized clinical trial | 36         | De Quervain's tenosynovitis                                     | 20ml of procaine subcutaneous infiltration                                                                       | Conventional treatment | NT was effective in reducing pain in patients with Tenosynovitis De Quervain                                                                                                                                                                                 | Pain evaluated with VAS and functionality evaluated with Duruöz Hand                                                                 |
| Brobyn T.                | 2015 | Case series               | 3          | Chronic refractory pain                                         | 0.5% of procaine                                                                                                 | No comparative group   | Inference field-type neural therapy on scars can generate significant improvement and long-term pain control                                                                                                                                                 | Decreased pain intensity                                                                                                             |
| Caponnetto V. et al.     | 2021 | Systematic review         | 7 studies  | Cervicogenic headache                                           | Differences between studies: lidocaine, bupivacaine, alone or with steroid (methylprednisolone or dexamethasone) | No comparative group   | Effective in reducing cervicogenic pain in acute or interictal phase, as well as being a relatively safe procedure.                                                                                                                                          | Variability in outcome measurement pattern. Use of VAS or Numeral Rating Scale (NRS.). Frequency of pain and duration of pain attack |

|                         |      |                           |     |                                                     |                                                                                             |                                       |                                                                                                                                                                                        |                                                                         |
|-------------------------|------|---------------------------|-----|-----------------------------------------------------|---------------------------------------------------------------------------------------------|---------------------------------------|----------------------------------------------------------------------------------------------------------------------------------------------------------------------------------------|-------------------------------------------------------------------------|
| Caputi C. et al.        | 1997 | Case report               | 27  | Migraine                                            | 0,5 to 1 ml of bupivacaine 0,5% intradermic injection                                       | No comparative group                  | Block of the greater occipital and supraorbital nerves appears to be effective in the treatment of migraine, but controlled studies are required.                                      | Pain assessed with the total pain index (TP1)                           |
| Celia T. et al.         | 2016 | Cohort study              | 168 | Women with persistent pain after 10 days postpartum | 1% procaine subdermal infiltration                                                          | No comparative group                  | The application of subdermal procaine is associated with the reduction of persistent postpartum pain                                                                                   | Degree of pain according to VAS, and number of treatment doses received |
| Corujeira M. et al      | 2010 | Prospective study         | 21  | Myofascial pain                                     | 1-2 ml 1% of lidocaine infiltration                                                         | Acupuncture                           | Positive effect of the infiltration in the decreased pain intensity                                                                                                                    | Decreased pain intensity                                                |
| Couto C. et al.         | 2014 | Randomized clinical trial | 78  | Myofascial pain                                     | 0.2 - 0.5 ml 1% of lidocaine infiltration at trigger points                                 | Placebo and intramuscular stimulation | Intramuscular stimulation was better than placebo and lidocaine infiltration                                                                                                           | Pain and depression assessed by scales                                  |
| Cuadrado M. et al.      | 2017 | Case series               | 18  | Migraine                                            | Bupivacaine 0,5%, 2 mL infiltration                                                         | No comparative group                  | Greater occipital nerve block seems effective in managing migraine symptoms with prolonged or persistent aura.                                                                         | Pain assessed with VAS                                                  |
| Darabad R. et al.       | 2020 | Case series               | 3   | Cancer-related facial pain                          | 1% lidocaine subcutaneous infiltration and 0.25% bupivacaine stellate ganglion infiltration | No comparative group                  | Stellate ganglion block is a therapeutic alternative in patients with facial pain associated with cancer or radiotherapy for cancer, and may improve quality of life in these patients | Numerical Rating Scale (NRS), use of analgesic medications              |
| De las torres M. et al. | 2008 | Randomized clinical trial | 60  | Renal lithiasis                                     | 1.5ml 1% of lidocaine intradermic infiltration                                              | No comparative group                  | Patients managed to expel the lithiasis from the fifth treatment session, regardless of the location and up to a diameter of 12mm                                                      | Expulsion from calculation                                              |

|                          |      |                               |     |                         |                                                                                      |                                                                                    |                                                                                                                                                                                 |                                                                                                                                  |
|--------------------------|------|-------------------------------|-----|-------------------------|--------------------------------------------------------------------------------------|------------------------------------------------------------------------------------|---------------------------------------------------------------------------------------------------------------------------------------------------------------------------------|----------------------------------------------------------------------------------------------------------------------------------|
| Díaz Alcorta T. et al.   | 2000 | Non-randomized clinical trial | 88  | Alopecia areata         | 0.5% of procaine subcutaneous infiltration                                           | Conventional treatment                                                             | Neural therapy proved to be a new effective therapeutic modality in the treatment of alopecia areata.                                                                           | Repopulation of alopecic areas                                                                                                   |
| Egli S. et al.           | 2015 | Case series                   | 280 | Chronic refractory pain | Lidocaine and procaine intradermic infiltration                                      | No comparative group                                                               | Long-term pain control with this therapy                                                                                                                                        | Pain evaluation in a five-level scale                                                                                            |
| Eugene L. et al.         | 2017 | Randomized clinical trial     | 120 | Ulcerative colitis      | 10ml 1% lidocaine stellate ganglion block                                            | Conventional treatment                                                             | Stellate ganglion block improves the efficacy of treatment in chronic ulcerative colitis, relieves clinical symptoms in patients and reduces the level of inflammatory factors. | Remission of symptoms and IL-8 values                                                                                            |
| Expósito Reyes O. et al. | 2007 | Phase II clinical trial       | 240 | Cyclic breast dysplasia | 2% of procaine diluted 1% with 0.9% saline subcutaneous and intradermic infiltration | Vitamin E (group II), with progesterone (group III) and with analgesics (group IV) | Satisfactory response with this treatment                                                                                                                                       | Pain relief                                                                                                                      |
| Fern L. et al.           | 2020 | Case series                   | 2   | Headache                | Not described                                                                        | No comparative group                                                               | Nerve block may be an optimal approach for the management of severe headache                                                                                                    | Impact Test and exacerbation control                                                                                             |
| Fischer L. et al.        | 2015 | Case report                   | 1   | Post-tonsillectomy pain | 1% procaine infiltration in postsurgical scare                                       | No comparative group                                                               | This is the first report of a successful therapeutic infiltration of a tonsillectomy scar in a patient refractory to medical treatment for several years.                       | Decreased pain intensity                                                                                                         |
| Fisher BM. et al.        | 2019 | Cohort study                  | 477 | Femur fracture          | Local anesthetic                                                                     | No comparative group                                                               | LA injection is associated with a reduction in opioid use in geriatric fracture patients with equivalent pain scores.                                                           | Amount of analgesia required measured in morphine equivalent milligrams (MME), days of hospital stay, and pain assessed with VAS |

|                        |      |                                                                                |            |                                                  |                                                    |                           |                                                                                                                                                                                                                                                                  |                                                                                                       |
|------------------------|------|--------------------------------------------------------------------------------|------------|--------------------------------------------------|----------------------------------------------------|---------------------------|------------------------------------------------------------------------------------------------------------------------------------------------------------------------------------------------------------------------------------------------------------------|-------------------------------------------------------------------------------------------------------|
| Fleckenstein J. et al. | 2018 | Case report                                                                    | 1          | Chronic plantar fasciitis                        | < 1 ml 1% procaine                                 | No comparative group      | Effectiveness with this therapy allowing a prompt return to sports practice.                                                                                                                                                                                     | Pain assessed with VAS                                                                                |
| Ga H. et al.           | 2007 | Randomized clinical trial                                                      | 40         | Myofascial pain syndrome                         | 0.2ml of 0.5% lidocaine trigger point infiltration | Acupuncture               | No statically significant differences                                                                                                                                                                                                                            | Pain intensity scores                                                                                 |
| Ga H. et al.           | 2007 | Randomized clinical trial                                                      | 43         | Myofascial pain syndrome                         | 0.5 of lidocaine infiltration al trigger points    | Intramuscular stimulation | No comparative improvement with de intramuscular stimulation                                                                                                                                                                                                     | Pain intensity scores                                                                                 |
| Garvey T. et al.       | 1989 | Randomized clinical trial                                                      | 63         | Low back pain                                    | 1% 1,5 ml of Lidocaine intradermic infiltration    | Conventional treatment    | The authors consider the injection of substances apparently not a critical factor and the direct mechanical stimulation of the trigger point seems to achieve equal symptomatic relief.                                                                          | Average of pain reduction                                                                             |
| Gibson RG. et al.      | 1999 | A pilot study followed by a double-blind, placebo-controlled randomized study. | 61         | Multiple sclerosis                               | 1% of lidocaine subcutaneous infiltration          | Placebo                   | Positive effect at the disability evaluation                                                                                                                                                                                                                     | Improvement on disability scales                                                                      |
| Goel V. et al.         | 2019 | Systematic review                                                              | 67 studies | Complications during the stellate ganglion nerve | No reported / local infiltration                   | No comparative group      | Most reported complications of stellate ganglion block are during or immediately after the block. They are also reported with both technical and imaging guide blockages. It notes the importance of continuous monitoring and access to resuscitation equipment | Report of the different complications reported in the literature secondary to stellate ganglion block |

|                          |      |                               |     |                                       |                                                       |                                                                             |                                                                                                                                                                                                 |                                                                                   |
|--------------------------|------|-------------------------------|-----|---------------------------------------|-------------------------------------------------------|-----------------------------------------------------------------------------|-------------------------------------------------------------------------------------------------------------------------------------------------------------------------------------------------|-----------------------------------------------------------------------------------|
| Gonzalez-Rivas G. et al. | 2018 | Non-randomized clinical trial | 178 | Post-surgical pain due to mammoplasty | 0,33% of procaine intradermic infiltration            | Acupuncture                                                                 | Despite the limitations of the study design, the use of NT may be recommended as an adjunctive treatment to reduce postoperative pain in patients undergoing axillary augmentation mammoplasty. | Post-surgical pain assessment                                                     |
| Gul H. et al.            | 2017 | Randomized clinical trial     | 44  | Chronic migraine                      | Bupivacaine 0,5% 1 ml intradermic injection           | Placebo                                                                     | Positive effect of the blockage                                                                                                                                                                 | Days of headache and pain evaluated with VAS                                      |
| Haller H. et al.         | 2018 | Qualitative study             | 22  | Chronic disease                       | 25–30 15 of procaine infiltration into trigger points | No comparative group                                                        | Patients treated with procaine injections reported different psychophysiological outcomes that contributed to the understanding of the mechanisms underlying TN                                 | Physical and emotional symptoms                                                   |
| Hasirci B. et al.        | 2022 | Case series                   | 53  | Cervicogenic headache                 | Lidocaine 2% local infiltration                       | No comparative group                                                        | Repeated occipital nerve block was effective in reducing pain in patients with migraine and tension headache and may be an alternative treatment in patient's refractory to other treatments.   | Pain intensity assessed with VAS                                                  |
| Hokenek N. et al.        | 2021 | Randomized clinical trial     | 128 | Acute migraine                        | 0.75 ml de 1% lidocaine intradermic injection         | Occipital Nerve Block (GON) Plus Supraorbital Nerve Block (SON) and Placebo | Supraorbital nerve block, greater occipital nerve block, and a combination of these two blocks are effective treatment methods in the acute treatment of migraine.                              | Pain assessed with VAS and Likert scale, requiring additional analgesic treatment |

|                  |      |                                      |    |                          |                                                        |                                                                                              |                                                                                                                                          |                                                                                                |
|------------------|------|--------------------------------------|----|--------------------------|--------------------------------------------------------|----------------------------------------------------------------------------------------------|------------------------------------------------------------------------------------------------------------------------------------------|------------------------------------------------------------------------------------------------|
| Hou J. et al.    | 2022 | Before and after study               | 81 | Migraine                 | 6 ml ropivacaine 0,15%                                 | No comparative group                                                                         | Blocking is an effective method of treating migraine. With decreased pain and disability which could improve the quality of life.        | Migraine Disability Rating Scale (MIDAS) and Numerical Rating Scale (NRS) at 3-month follow-up |
| Huang Y. et al.  | 2022 | Case report                          | 1  | Unexplained chronic pain | ropivacaine 0.16% Stellate ganglion infiltration       | No comparative group                                                                         | Effective in improving chronic pain not medically explained, suggesting a clinical trial to evaluate the effectiveness of the treatment. | Pain intensity assessed with VAS, HAMA (Hamilton anxiety scale)                                |
| Hui F. et al.    | 1999 | Case reports                         | 56 | Post herpetic neuralgia  | 1% of procaine infiltration in the affected dermatomes | Combined therapies: acupuncture, Chinese herbal therapy, meditation, or nerve block with LA. | Combined therapies are an effective treatment for postherpetic neuralgia                                                                 | Average of pain reduction in postherpetic neuralgia (PHN)                                      |
| Iguchi M. et al. | 2002 | Randomized controlled clinical trial | 60 | Renal pain               | 10-15 ml 1% lidocaine subcutaneous infiltration        | Butylscopolamine                                                                             | Safe and effective method to renal colic reduction                                                                                       | Pain reduction                                                                                 |
| Inan L. et al.   | 2015 | Randomized clinical trial            | 84 | Chronic migraine         | 1.5 ml 0.5% bupivacaine intradermic injection          | Placebo                                                                                      | Results suggest that major occipital nerve block is superior in pain control in intensity and days compared to placebo                   | Days of headache and pain evaluated with VAS                                                   |
| Inoue M. et al.  | 2009 | Randomized clinical trial            | 26 | Chronic low back pain    | 5 mg of dibucaine hydrochloride infiltration           | Acupuncture                                                                                  | Acupuncture has a more immediate effect and sustained effect on pain control                                                             | Pain assessment                                                                                |
| Inoue M. et al.  | 2014 | Randomized clinical trial            | 26 | Chronic low back pain    | Dibucaine 5mg/5ml intradermic injection                | Conventional treatment                                                                       | Both lidocaine injection and acupuncture relieve pain, but acupuncture was superior for immediate pain control and sustained effects     | Pain assessed with VAS                                                                         |



|                        |      |                                      |     |                                                                            |                                                 |                                                        |                                                                                                                                                                                                                                                                                       |                                                       |
|------------------------|------|--------------------------------------|-----|----------------------------------------------------------------------------|-------------------------------------------------|--------------------------------------------------------|---------------------------------------------------------------------------------------------------------------------------------------------------------------------------------------------------------------------------------------------------------------------------------------|-------------------------------------------------------|
| István M. et al.       | 2018 | Case series                          | 12  | Raynaud's syndrome                                                         | 5ml 0.25% of bupivacaine ganglion infiltration  | No comparative group                                   | More studies are needed                                                                                                                                                                                                                                                               | Skin temperature, trophism and pain assessed with VAS |
| Jeon Y. et al.         | 2015 | Case report                          | 1   | Atypical facial pain                                                       | 6 ml lidocaine 1,5% Intradermic injection       | No comparative group                                   | Case report documents pain relief after 2 months of follow-up                                                                                                                                                                                                                         | Pain control                                          |
| Jonnavithula N. et al. | 2019 | Randomized clinical trial            | 30  | Postoperative pain at the donor site in buccal mucosal graft urethroplasty | 1 mL of 0.5% bupivacaine intradermic injection  | No comparative group                                   | Infraorbital nerve block is associated with postoperative analgesia and facilitates early food intake, mitigating donor site morbidity and providing satisfaction.                                                                                                                    | Intraoral morbidity and patient satisfaction          |
| Julide O. et al.       | 2021 | Case series                          | 280 | Chronic and refractory pain                                                | Procaine and lidocaine intradermic infiltration | No comparative group                                   | The low costs of LAs, the reduced number of consultations required, the reduced intake of analgesics and the lack of adverse effects also suggests the practicality and cost-effectiveness of this type of treatment. Controlled trials are required for assess the true effect of TN | Pain control                                          |
| Kahokehr A. et al.     | 2011 | Systematic review and meta-analysis  | 426 | Abdominal pain due to laparoscopic surgery                                 | Intraperitoneal anesthetics                     | Placebo                                                | In the postsurgical period this therapy is effective in the management of abdominal pain and the use of opioids                                                                                                                                                                       | Pain relief and use of opioids to pain management     |
| Kamanli A. et al.      | 2005 | Randomized controlled clinical trial | 29  | Myofascial pain syndrome                                                   | 1 ml of 0.5% lidocaine infiltration             | Botulinum toxin and dry injection into trigger points. | Positive effect                                                                                                                                                                                                                                                                       | Improvement of symptoms                               |
| Karadaş Ö. et al.      | 2013 | Randomized clinical trial            | 48  | Chronic tension-type headache                                              | 0.5% of lidocaine                               | Placebo                                                | This therapy may be and alternative for the headache pain relief                                                                                                                                                                                                                      | Pain evaluation by scales                             |

|                    |      |                                     |                   |                                        |                                                     |                        |                                                                                                                                                                                                                                                                     |                                                                                                       |
|--------------------|------|-------------------------------------|-------------------|----------------------------------------|-----------------------------------------------------|------------------------|---------------------------------------------------------------------------------------------------------------------------------------------------------------------------------------------------------------------------------------------------------------------|-------------------------------------------------------------------------------------------------------|
| Kim J. et al.      | 2017 | Systematic review and meta-analysis | 1,645 (9 studies) | Postherpetic neuralgia                 | Bupivacaine                                         | Placebo and acyclovir  | The use of blockages during the acute phase of herpes zoster shortens the duration of related pain and the incidence of postherpetic neuralgia                                                                                                                      | Incidence of postherpetic neuralgia, duration of acute pain                                           |
| Kimura T. et al.   | 2005 | Case report                         | 7                 | Hypertension                           | Mepivacaine 1-2% 5 to 8 ml Intradermic injection    | No comparative group   | It is considered that the diffusion of LA can generate a vagal block. Monitoring of blood pressure figures is recommended in those who receive blockages                                                                                                            | Hypertension and tachycardia                                                                          |
| Kindberg S. et al. | 2008 | Randomized clinical trial           | 129               | Pain after postpartum surgical repairs | 4% of lidocaine intradermic infiltration            | Acupuncture            | Ear acupuncture was less effective for pain relief compared to a LA. No differences were observed in wound healing, need for wound revision or dyspareunia. Patient satisfaction with the assigned pain relief method was lower in the auricular acupuncture group. | Pain assessed with VAS                                                                                |
| Korucu O. et al.   | 2018 | Randomized clinical trial           | 60                | Acute migraine                         | 1 mL of 0.5% bupivacaine intradermic injection      | Placebo and analgesics | Despite being an invasive procedure, a GON block could be an effective option. For the treatment of acute migraine in the emergency room due to its fast, easy, and safe application.                                                                               | Pain scale score                                                                                      |
| Kouri M. et al.    | 2021 | Case report                         | 17                | Chronic headache                       | 0.3 mL 0.5% bupivacaine injection into each nostril | No comparative group   | Sphenopalatine ganglion blockade could have a beneficial effect at the level of headache prevention in adolescents, with impact                                                                                                                                     | Patient's Global Impression of Change score y Revised Children's Anxiety and Depression Scale (RCADS) |

|                      |      |              |    |                              |                                                           |                                                                   |                                                                                                                                                                                                                                 |                                                             |
|----------------------|------|--------------|----|------------------------------|-----------------------------------------------------------|-------------------------------------------------------------------|---------------------------------------------------------------------------------------------------------------------------------------------------------------------------------------------------------------------------------|-------------------------------------------------------------|
|                      |      |              |    |                              |                                                           |                                                                   | on PGIC and the RCADS depression subscale.                                                                                                                                                                                      |                                                             |
| Kronenberg R. et al. | 2018 | Case report  | 1  | Chronic pelvic pain syndrome | 1% 5ml of procaine vesicoprostatic plexus infiltration    | No comparative group                                              | This is the first report of successful therapeutic infiltration of the vesicoprostatic plexus using a LA.                                                                                                                       | Pain assessment                                             |
| Lee A. et al.        | 2018 | Case series  | 3  | Postoperative hiccups        | 0.5ml 0.2% ropivacaine stellate ganglion infiltration     | No comparative group                                              | Stellate ganglion block is an effective method for controlling hiccups                                                                                                                                                          | Hiccup                                                      |
| León R. et al.       | 2016 | Case series  | 9  | Chronic pelvic pain          | Procaine intradermic infiltration                         | No comparative group                                              | NT is an alternative for the treatment of patients suffering from chronic pelvic pain, since it allowed a noticeable decrease in pain, by producing pain modifications in VAS and a decrease in the frequency of pain per week. | Pain assessed with VAS                                      |
| Levene R.            | 2015 | Cohort study | 44 | Chronic low back pain        | Local anesthetic infiltration at trigger points           | Physiotherapy and psychotherapy as a multidisciplinary assessment | Multidisciplinary assessment of low back pain has a positive effect                                                                                                                                                             | Pain and depression evaluation by scales                    |
| Liu Q. et al.        | 2020 | Case report  | 1  | Post-stroke pain             | 2 ml lidocaine 2% Ultrasound-guided intradermal injection | No comparative group                                              | Stellate ganglion block in a treatment option in pain refractory to pharmacotherapy                                                                                                                                             | VAS-assessed pain, Barthel Activities of Daily Living Scale |
| Loriz O.             | 2013 | Cohort study | 46 | Painful shoulder             | Segmental anesthetic                                      | No comparative group                                              | This therapy is useful to pain relief and use of oral medication in this pathology                                                                                                                                              | Pain evaluation by scales                                   |

|                   |      |                               |    |                                |                                                                   |                        |                                                                                                                                                                                                                 |                                                                                                                                                             |
|-------------------|------|-------------------------------|----|--------------------------------|-------------------------------------------------------------------|------------------------|-----------------------------------------------------------------------------------------------------------------------------------------------------------------------------------------------------------------|-------------------------------------------------------------------------------------------------------------------------------------------------------------|
| Lóriz O.          | 2015 | Non-randomized clinical trial | 58 | Osteoarthritis of the knee     | 1% of procaine infiltration                                       | Conventional treatment | This therapy may be a good therapy for knee pain relief                                                                                                                                                         | Pain evaluation by scales                                                                                                                                   |
| Lóriz O. et al.   | 2011 | Before and after study        | 82 | Acute and chronic pain         | 1% of procaine intradermic infiltration                           | No comparative group   | Effectiveness with this therapy in the decreased pain intensity and oral medication                                                                                                                             | Assessment of pain and oral medication                                                                                                                      |
| Lynch JH. et al.  | 2016 | Case series                   | 30 | Post-traumatic stress syndrome | 7 mL 0.5% ropivacaine stellate ganglion block                     | No comparative group   | As a result of the significant reduction in observed hyperarousal and avoidance symptoms, this study supports the incorporation of stellate ganglion block into post-traumatic stress syndrome treatment plans. | PTSD (post-traumatic stress disorder) Checklist-Military. (PCL-M)                                                                                           |
| M Pfister. et al. | 2009 | Case series                   | 2  | Complex regional pain syndrome | 4 ml of procaine                                                  | No comparative group   | LA infiltration plus oral medication is effective in this pathology                                                                                                                                             | Pain control                                                                                                                                                |
| Machado F. et al. | 2021 | Case series                   | 6  | Headache after SARS-CoV-2      | 2% lidocaine intranodal blockade                                  | No comparative group   | This study has several limitations, but it is the first report to show the efficacy of intranodal blockade in headache control.                                                                                 | Pain control                                                                                                                                                |
| Maki P. et al.    | 2016 | Randomized clinical trial     | 36 | Learning and verbal memory     | 0.5% bupivacaine (5ml) fluoroscopy-guided intranodal infiltration | Placebo                | This pilot trial provides new tentative evidence of the impact of blocking on verbal memory with no impact on logical memory                                                                                    | Verbal memory assessed with California Verbal Learning Test (CVLT) and logical memory assessed with Logical Memory Subtest of Wechsler Memory Scale-Revised |

|                     |      |                                 |     |                          |                                                        |                                                            |                                                                                                                                                                            |                                                      |
|---------------------|------|---------------------------------|-----|--------------------------|--------------------------------------------------------|------------------------------------------------------------|----------------------------------------------------------------------------------------------------------------------------------------------------------------------------|------------------------------------------------------|
| McCormick Z. et al. | 2018 | Randomized clinical trial       | 4   | Postamputation pain      | 1-2 ml lidocaine 1%<br>Fluoroscopy-guided injection    | Placebo                                                    | Study with few patients, little power, without documentation of the physiopathological mechanism that impacts the outcome. Further studies required                        | Residual phantom limb pain, pain and quality of life |
| Medrano G. et al.   | 2011 | Open, multicentric clinic trial | 34  | Low back pain            | 1% of procaine subcutaneous infiltration               | No comparative group                                       | Positive effect in the pain reduction with this therapy                                                                                                                    | Pain evaluation by scales                            |
| Mellick LB. et al.  | 2008 | Retrospective cohort study      | 114 | Orofacial pain           | 0.5% Bupivacaine local infiltration                    | No comparative group                                       | therapeutic response was documented in 94% of patients. Complete pain relief in 48%, clinical improvement in 18% and partial relief in 28% of the 114 documented patients. | Pain relief                                          |
| Mellick LB. et al.  | 2010 | Retrospective cohort study      | 13  | Headache                 | 1 to 1,5 ml 0.5% of bupivacaine                        | No comparative group                                       | Partial and complete improvement of headache was demonstrated                                                                                                              | Pain relief                                          |
| Mermod J. et al.    | 2008 | Cohort study                    | 405 | Musculoskeletal diseases | No intervention                                        | Conventional treatment                                     | More satisfaction with neural therapy than with conventional treatment                                                                                                     | Neural therapy satisfaction                          |
| Michels T. et al.   | 2007 | Retrospective cohort study      | 238 | Cervical pain            | 0.2 ml of 0.5% of Mepivacaine intradermic infiltration | No comparative group with alternative therapies or placebo | Long-term remission of the symptoms                                                                                                                                        | Remission of the symptoms                            |
| Michels T. et al.   | 2018 | Cohort study                    | 127 | Peripheral pain          | 0.1 a 0.2 ml 0.5% of mepivacaine                       | No comparative group                                       | Local anesthetics in low concentrations and small amounts proved to be highly effective in the treatment of peripheral pain.                                               | Pain assessed with VAS                               |
| Millan M. et al.    | 1991 | Randomized clinical trial       | 30  | Myofascial pain          | 1% of procaine intradermic infiltration                | Placebo                                                    | It is recognized that the therapeutic value of procaine in the management of                                                                                               | Pain threshold and intensity                         |

|                       |      |                           |    |                                          |                                                                       |                              |                                                                                                                                                                                  |                                                                                                   |
|-----------------------|------|---------------------------|----|------------------------------------------|-----------------------------------------------------------------------|------------------------------|----------------------------------------------------------------------------------------------------------------------------------------------------------------------------------|---------------------------------------------------------------------------------------------------|
|                       |      |                           |    |                                          |                                                                       |                              | myofascial pain is questionable.                                                                                                                                                 |                                                                                                   |
| Mitidieri AMS. et al. | 2020 | Randomized clinical trial | 35 | Abdominal myofascial pain syndrome       | 2ml 1% of lidocaine                                                   | Ashi acupuncture             | No statically significant differences between de two therapies.                                                                                                                  | Pain assessed with VAS                                                                            |
| Molnár I. et al.      | 2019 | Case series               | 16 | Pain due to unresectable pancreas cancer | 5ml 1% of lidocaine retrocrural and guided puncture under fluoroscope | No comparative group         | What was observed in the case series shows that celiac plexus block could be a complementary treatment to unresectable pancreas cancer, with improvement in quality of life      | Quality of life assessed with SF36, and pain control assessed with VAS 35 days after intervention |
| Moon S. et al.        | 2020 | Case report               | 2  | Chronic headache                         | 5 ml lidocaine 1,5% intradermic injection                             | No comparative group         | The authors consider the block of the stellate ganglion could be to improve headache and disability in patients with chronic migraine                                            | Pain evaluated with VAS and MIDAS                                                                 |
| Naja Z. et al.        | 2009 | Randomized clinical trial | 47 | Postdural puncture headache              | Lidocaine al 2%, 3 ml intradermic injection                           | Hydration, rest an analgesic | Findings suggest occipital nerve block may be a successful alternative Treatment for patients suffering from post-puncture headache with an earlier return to regular activities | Pain assessed with VAS                                                                            |
| Nassar A. et al.      | 2021 | Before and after study    | 93 | Headache                                 | 5ml 1% of lidocaine intramuscular and subcutaneous infiltration       | No comparative group         | Differences were found in 7 of the 8 domains of SF 36 when comparing before and after and improvement in the frequency of symptoms                                               | Quality of life assessed with SF 36 and frequency of symptoms                                     |
| Okmen K. et al.       | 2016 | Case series               | 60 | Migraine                                 | bupivacaine 0,5% local infiltration                                   | No comparative group         | Although infiltration of the greater occipital nerve does not cure migraine, it is useful as a support treatment. It can                                                         | EVA, MIDAS (The Migraine Disability Assessment Questionnaire) al 3er y 6o mes                     |

|                   |      |                                     |     |                                      |                                                            |                                   |                                                                                                                                                 |                                                                                       |
|-------------------|------|-------------------------------------|-----|--------------------------------------|------------------------------------------------------------|-----------------------------------|-------------------------------------------------------------------------------------------------------------------------------------------------|---------------------------------------------------------------------------------------|
|                   |      |                                     |     |                                      |                                                            |                                   | be used in different age groups.                                                                                                                |                                                                                       |
| Ong J. et al.     | 2014 | Systematic review and meta-analysis | 266 | Myofascial pain                      | 2 ml 1% of Lidocaine                                       | Dry injection into trigger points | No significant differences between these interventions                                                                                          | Pain evaluation by scales                                                             |
| Özer D. et al.    | 2019 | Randomized clinical trial           | 87  | Migraine                             | 2 ml lidocaine 1% intradermic injection                    | Placebo                           | greater occipital and supraoccipital nerve block was more effective than placebo                                                                | Days of headache and pain evaluated with VAS                                          |
| P. Barbagli.      | 1998 | Cohort study                        | 115 | Knee pain                            | 0.5 to 1 ml 0.5 - 1% of lidocaine intradermic infiltration | No comparative group              | Reported results suggest good treatment effectiveness for knee pain control, but randomized clinical trials are required                        | Pain assessed at 1-, 3- and 6-months follow-up (percentage of subjective improvement) |
| Paneque R. et al. | 2009 | Cohort study                        | 50  | Acute alveolar dental abscess        | No reported                                                | No comparative group              | Study with important limitations, which reports in general the symptomatic improvement                                                          | Pain and inflammation of root canals                                                  |
| Peraza R. et al.  | 2011 | Open phase II clinical trial        | 47  | Epicondylitis                        | 0.2–0.5 ml 2% of procaine infiltration at trigger points   | No comparative group              | Significant decrease in pain and functional improvement                                                                                         | Pain and functional assessment                                                        |
| Perloff M. et al. | 2018 | Case report                         | 9   | Refractory trigeminal neuralgia      | 0,5 ml bupivacaine 0,25% intradermic injection             | No comparative group              | patients achieved rapid and sustained pain relief with the blockage.                                                                            | Percentage of pain control                                                            |
| R Spornol. et al. | 1982 | Case reports                        | 10  | Neuropathic disorders of the bladder | Paraurethral injection of 2.5ml of 1% lidocaine solution   | No comparative group              | Effective treatment in motor and sensory urgency                                                                                                | Improvement of the symptoms of urgency and frequency and side effects                 |
| Rae O. et al.     | 2020 | Randomized clinical trial           | 113 | Post-traumatic stress syndrome       | 7 to 10 mL 0.5% ropivacaine stellate ganglion block        | Placebo                           | The findings suggest the possible effect of stellate ganglion block on the management of post-traumatic stress, so further studies are required | Clinician-Administered PTSD Scale for DSM-5 (CAPS-5)                                  |

|                        |      |                          |    |                             |                                                      |                      |                                                                                                                                                                                                                                                                    |                                                          |
|------------------------|------|--------------------------|----|-----------------------------|------------------------------------------------------|----------------------|--------------------------------------------------------------------------------------------------------------------------------------------------------------------------------------------------------------------------------------------------------------------|----------------------------------------------------------|
| Reis M. et al.         | 1990 |                          | 16 | Postherpetic neuralgia      | 15ml 1% lidocaine local infiltration                 | No comparative group | Variable pain control with the use of block, which showed greater effect in the absence of associated psychological symptoms                                                                                                                                       | Pain reduction                                           |
| Rey Novoa M. et al.    | 2021 | Case series              | 5  | Vulvodynia                  | 0.5% of procaine                                     | No comparative group | Procaine injection showed favorable outcomes, further studies required                                                                                                                                                                                             | Pain assessed with VAS, frequency of symptom improvement |
| Reyes-Corona L. et al. | 2009 | Prospective cohort study | 72 | Pelvic inflammatory disease | 1% of Procaine or lidocaine intradermic infiltration | No comparative group | Efficacy of this therapy in this pathology                                                                                                                                                                                                                         | Resolution of symptoms as good, regular, or bad response |
| Ruiz M. et al.         | 2016 | Case series              | 60 | Migraine                    | 1:1 bupivacaine 0.5% y mepivacaine 2%                | No comparative group | Anesthetic block of pericranial nerves using sensitivity to Palpation as a selection criterion is a safe and potentially effective procedure as a preventive treatment of migraine                                                                                 | Percentage response in pain control, adverse events      |
| Ruiz-Mejía A. et al.   | 2020 | Case report              | 1  | Acute stress disorder       | Procaine trigger points infiltration                 | No comparative group | The neuraltherapeutic approach allowed, on the one hand, to identify a link between the patient's dissociative symptoms and the associated organic alteration, and, on the other, to make an intervention with which the resolution of such symptoms was achieved. | Pain relief                                              |
| Russi Garzón. J        | 2012 | Before and after study   | 64 | Musculoskeletal pain        | 0.5% of procaine                                     | No comparative group | The use of this therapy has a positive impact in the quality of life                                                                                                                                                                                               | Quality of life assessed with SF-36                      |
| Saha FJ. et al.        | 2014 | Case report              | 1  | Chronic pain syndrome       | 2ml of procaine 1%                                   | No applicable        | This therapy may be effective in complicated cases of vulvodynia                                                                                                                                                                                                   | Pain evaluation by scales                                |



|                            |      |                                     |                 |                                     |                                                                                                                              |                                           |                                                                                                                                                                                            |                                                                                                                           |
|----------------------------|------|-------------------------------------|-----------------|-------------------------------------|------------------------------------------------------------------------------------------------------------------------------|-------------------------------------------|--------------------------------------------------------------------------------------------------------------------------------------------------------------------------------------------|---------------------------------------------------------------------------------------------------------------------------|
| Sencan S. et al.           | 2022 | Randomized clinical trial           | 34              | Chronic coccygodynia                | 3 ml d prilocaine 2% Fluoroscopy-guided injection                                                                            | Caudal steroid injection                  | The two interventions evaluated showed usefulness in the treatment of chronic coccydynia                                                                                                   | Pain intensity. Presence of neuropathic pain                                                                              |
| Sermeus L. et al.          | 2018 | Randomized clinical trial           | 20              | Pain due to shoulder arthroscopy    | Levobupivacaine 0.5% stellate ganglion block                                                                                 | Paravertebral cervical block              | No additional antinociceptive benefit of adding a stellate ganglion block to cervical paravertebral block was demonstrated for the treatment of acute pain caused by arthroscopic surgery. | Nociceptive and nocisensitive thresholds                                                                                  |
| Sevgi Gümüş Atalay. et al. | 2020 | Randomized clinical trial           | 92              | Lateral epicondylitis               | 0.5ml 2% Lidocaine subcutaneous infiltration                                                                                 | Extracorporeal shockwave therapy          | No statically significant differences between de two therapies.                                                                                                                            | Pain assessed with VAS and functional recovery assessed with DHI score                                                    |
| Tamam Y. et al.            | 2017 | Cohort study                        | 28              | Multiple sclerosis                  | 40 ml of lidocaine Intradermic injection into the urogenital segment                                                         | No comparative group                      | Neural therapy could be effective in the treatment of neurogenic bladder in patients with multiple sclerosis, more studies are needed                                                      | Control of neurogenic hyperactivity of the detrusor with urodynamic evaluation and quality of life evaluated with MSQL-54 |
| Tang Y. et al.             | 2017 | Systematic review and meta-analysis | 297 (6 studies) | Migraine                            | Lidocaine or bupivacaine or triamcinolone, triamcinolone+Lidocaine 2%, o Triamcinolone + Bupivacaine 0,5% local infiltration | Placebo                                   | The use of major occipital nerve block in migraine patients is recommended                                                                                                                 | Severity of pain, number of days with pain, consumption of analgesic medications                                          |
| Tepe N. et al.             | 2020 | Cohort study                        | 82              | Chronic medication overuse headache | 3 mL 0.25% bupivacaine intradermic injection                                                                                 | nerve block plus supraorbital nerve block | The study showed significant reductions in headache parameters in both groups. However, pain score, analgesic intake, number of painful days and duration of pain improved                 | Pain assessed with symptom score, number of days with pain in 1 month                                                     |

|                          |      |                           |    |                                                           |                                                 |                                                                                                                 |                                                                                                                                                                                                             |                                                                                                                                                    |
|--------------------------|------|---------------------------|----|-----------------------------------------------------------|-------------------------------------------------|-----------------------------------------------------------------------------------------------------------------|-------------------------------------------------------------------------------------------------------------------------------------------------------------------------------------------------------------|----------------------------------------------------------------------------------------------------------------------------------------------------|
|                          |      |                           |    |                                                           |                                                 |                                                                                                                 | significantly in the combined blocks group.                                                                                                                                                                 |                                                                                                                                                    |
| Terzi T. et al.          | 2002 | Randomized clinical trial | 60 | Migraine, tension-type headache and cervicogenic headache | 1ml prilocaine 2% intradermic injection         | Placebo                                                                                                         | Greater occipital nerve block is effective and useful for the diagnosis of cervicogenic headache                                                                                                            | Headache evaluated with VAS                                                                                                                        |
| Trevin G. et al.         | 2012 | Phase IIb clinical trial  | 70 | Acute mechanical low back pain                            | Procaine infiltration                           | No comparative group                                                                                            | Positive effect with this therapy                                                                                                                                                                           | Effectiveness of neural therapy                                                                                                                    |
| Triantafyllidi H. et al. | 2016 | Cohort study              | 22 | Hypertension                                              | 2% lidocaine on cotton applicator               | No comparative group                                                                                            | Sphenopalatine ganglion block could be a promising, non-invasive, safe, painless, and easy-to-perform blood pressure lowering therapeutic option                                                            | Control of blood pressure, percentage of responders (defined as reduction of 5mmHg at 24h after blockage)                                          |
| Triantafyllidi H. et al. | 2018 | Randomized clinical trial | 44 | Hypertension                                              | Bilateral cervical injection of 2% lidocaine    | Placebo                                                                                                         | Bilateral sphenopalatine block is a minimally invasive option, which decreases the values of arterial tension                                                                                               | Reduction of blood pressure values, percentage of responders defined with post-blockade reduction of systolic blood pressure (SBP) more than 5mmHg |
| Ural F. et al.           | 2017 | Randomized clinical trial | 42 | Epicondylitis                                             | 16ml 0.5% of lidocaine intradermic infiltration | Non-invasive treatment                                                                                          | NT improves pain and functional status in patients with lateral epicondylitis                                                                                                                               | Pain assessed with VAS; hand performance status assessed with Duruoz hand index (DHI)                                                              |
| Valencia Moya A. et al.  | 2020 | Randomized clinical trial | 55 | Chronic low back pain                                     | 20mg of procaine                                | Paravertebral lumbar infiltration, intramuscular injection two centimeters from the spinous processes of L3-L4. | Treatment with TNS achieved statistically significant pain relief at three months. A statistically significant reduction in disability associated with low back pain was observed in the group treated with | Pain assessed with VAS at week 0, 3 and 12 months                                                                                                  |

|                             |      |                           |    |                                                                |                                                                                    |                      |                                                                                                                                                                                                 |                                                          |
|-----------------------------|------|---------------------------|----|----------------------------------------------------------------|------------------------------------------------------------------------------------|----------------------|-------------------------------------------------------------------------------------------------------------------------------------------------------------------------------------------------|----------------------------------------------------------|
|                             |      |                           |    |                                                                |                                                                                    |                      | combined injection at 3 months, not being significant when comparing the groups with each other.                                                                                                |                                                          |
| Vanterpool S. et al.        | 2020 | Case series               | 50 | Occipital headache                                             | Bupivacaine 0.25%, by alternative suboccipital approach with paresthesia technique | No comparative group | The alternative suboccipital technique with paresthesia for occipital nerve block is an option in the treatment of neuropathic occipital headache.                                              | Rating Scale (NRS)                                       |
| Villamizar Olarte D. et al. | 2016 | Randomized clinical trial | 66 | Neck or low back pain                                          | 0,2-0,4 cc 1% of procaine intradermic injection                                    | Placebo              | NT has been shown to be effective and safe in the treatment of neck and low back pain, as well as improving the function of patients with low back pain and those treated in interfering fields | VAS-assessed pain, functional disability, medication use |
| Walega D. et al.            | 2014 | Randomized clinical trial | 40 | Vasomotor symptoms in women with natural or surgical menopause | 5ml 0.5% bupivacaine stellate ganglion block                                       | Placebo              | Stellate ganglion block may provide effective treatment of vasomotor symptoms in women seeking non-hormonal treatments due to safety concerns and personal preference                           | Vasomotor symptoms                                       |
| Wang S. et al.              | 2017 | Case report               | 1  | Epilepsy                                                       | 5 ml 1% lidocaine stellate ganglion infiltration                                   | No comparative group | Stellate ganglion block may be an effective treatment of intractable partial epilepsy. Further studies are required to verify validity.                                                         | Seizures                                                 |
| Weinschenk S. et al.        | 2013 | Case report               | 1  | Vulvodynia                                                     | 3-15ml 1% of procaine                                                              | No comparative group | This therapy may be useful in complicated vulvodynia                                                                                                                                            | Adverse effects and pain control                         |

|                      |      |                           |     |                                 |                                                           |                                                 |                                                                                                                                                                                                                     |                                                                                                        |
|----------------------|------|---------------------------|-----|---------------------------------|-----------------------------------------------------------|-------------------------------------------------|---------------------------------------------------------------------------------------------------------------------------------------------------------------------------------------------------------------------|--------------------------------------------------------------------------------------------------------|
| Weinschenk S. et al. | 2016 | Cohort study              | 17  | Neck pain refractory to therapy | 0.5 ml 1% of procaine<br>Injection into the palatine veil | No comparative group                            | Patients with chronic pharyngeal disease may benefit from neural therapy                                                                                                                                            | Pain assessed with an index of three levels (0,1,2)                                                    |
| Weinschenk S. et al. | 2016 | Case series               | 20  | Vulvodynia                      | 1% procaine infiltration                                  | No comparative group                            | Perineal pudendal injection is an effective and safe method for anesthesia in diagnostic processes (vulvar biopsy) and therapeutic indications (pudendal neuralgia), and regional anesthesia in perinatal settings. | Analgesia and adverse events                                                                           |
| Weinschenk S. et al. | 2017 | Randomized clinical trial | 177 | Allergic reaction evaluation    | Procaine 1%, lidocaine 0.5%, mepivacaine 1%               | Placebo                                         | The study showed no allergenicity of LAs. Procaine injection induces an erythema that persists for more than 10 minutes and is probably caused by vasodilation, rather than an allergic reaction.                   | Type 1 allergy                                                                                         |
| Yavuz F. et al.      | 2016 | Case report               | 1   | Paralysis of the facial nerve   | 10 ml 0.4% of lidocaine subcutaneous infiltration         | No comparative group                            | Neural therapy could be effective in the treatment of facial paralysis                                                                                                                                              | Response to therapy with House-Brackmann score                                                         |
| Yera-Nadal J. et al. | 2003 | Prospective cohort study  | 57  | Herpes Zoster                   | Trigger point injection of 0.5% of Procaine               | N comparative group                             | Positive effect in the neuralgia pain reduction                                                                                                                                                                     | Pain reduction assessment                                                                              |
| Yilmaz E. et al.     | 2021 | Randomized clinical       | 50  | Chronic low back pain           | 2ml 0.4% of lidocaine                                     | 4ml of lidocaine 2% combined with betamethasone | NT may be an alternative for the management of chronic low back pain that does not respond to conventional treatment                                                                                                | Pain assessed with VAS, and disability assessed with the Roland Morris Disability Questionnaire (RMDQ) |

|                     |      |                                       |           |                                              |                                              |                             |                                                                                                                                                                                          |                                                                                                                         |
|---------------------|------|---------------------------------------|-----------|----------------------------------------------|----------------------------------------------|-----------------------------|------------------------------------------------------------------------------------------------------------------------------------------------------------------------------------------|-------------------------------------------------------------------------------------------------------------------------|
| Yilmaz V. et al.    | 2019 | Case series                           | 20        | Migraine                                     | Bupivacaine 0,25%, 2mL local infiltration    | No comparative group        | Major occipital nerve block reduces the severity of pain in patients with migraine and fibromyalgia and improves function.                                                               | VAS-assessed pain, Fibromyalgia Impact Questionnaire (FIQR) function and MIDAS (Migraine Disability assessment test)    |
| Zagorulko O. et al. | 2019 | Cohort study                          | 43        | Cervicogenic headache                        | Articaine 2% intradermic injection           | Lidocaine 2%                | Occipital nerve blocks with 2% articaine show a significant decrease in pain intensity and duration of pain paroxysms in a short period of time for patients with cervicogenic headache. | VAS-assessed pain, individual duration of paroxysmal pain                                                               |
| Zarate MA. et al.   | 2020 | Randomized clinical trial (pragmatic) | 29        | Temporomandibular dysfunction                | 0.2% of lidocaine                            | Dextrose prolotherapy (DPT) | Intra-articular DPT resulted in clinically important and statistically significant improvement in pain and dysfunction at 12 months compared with lidocaine injection.                   | Intensity of temporomandibular pain and mandibular dysfunction (numerical scale of 0-10) dysfunction at 3 and 12 months |
| Zhang H. et al.     | 2018 | Systematic review and meta-analysis   | 7 studies | Migraine                                     | Lidocaine, bupivacaine intradermic injection | Placebo                     | Major occipital nerve block significantly decreases pain intensity, with an adequate safety profile without an increase in adverse events                                                | Pain intensity, headache duration, adverse effects                                                                      |
| Zhu Z. et al.       | 2019 | Cohort study                          | 132       | Pain due to laparoscopic radical gastrectomy | 40ml 0.5% of Ropivacaine                     | No analgesia                | Infiltration with ropivacaine showed an analgesic effect in the postoperative period, with a good safety profile, randomized clinical trials are required to confirm the findings        | Pain intensity assessed on a numerical scale, need for rescue medication and complications                              |

Vinyes D, Muñoz-Sellart M, Fischer L. Therapeutic Use of Low-Dose Local Anesthetics in Pain, Inflammation, and Other Clinical Conditions: A Systematic Scoping Review. *Journal of Clinical Medicine*. 2023; 12(23):7221. <https://doi.org/10.3390/jcm12237221>
